# Supplementary material for: Exploring structural and optical properties of CLSO:Dy for ultra-sensitive luminescent thermometers and high-bright screen printing
Source: Royal Society of Chemistry journal article supplement (doi:10.1039/d4qi01255k), 2024-01-01
Supplement: d4qi01255k1.pdf [file d4qi01255k1.pdf]

## Supporting Information

Xinyao Zhang<sup>a</sup>, Zhen Sun<sup>a\*</sup>, Ruiying Lu<sup>a</sup>, Jiarui Xu<sup>a</sup>, Hongyu Xu<sup>a</sup>, Wei Xu<sup>b</sup>

<sup>a</sup> *Key Laboratory for Microstructural Material Physics of Hebei Province, School of Science, Yanshan University, Qinhuangdao 066004, P.R. China.*

<sup>b</sup> *School of Electrical Engineering, Yanshan University, Qinhuangdao, 066004, China.*

\*[zsun@ysu.edu.cn](mailto:zsun@ysu.edu.cn)

**Table S1** Refine data and lattice parameters

| Formula                  | CLSO:0.02Dy <sup>3+</sup>            | CLSO:0.02Dy <sup>3+</sup> ,0.03Eu <sup>3+</sup> | CLSO:0.02Dy <sup>3+</sup> ,0.03Tb <sup>3+</sup> |
|--------------------------|--------------------------------------|-------------------------------------------------|-------------------------------------------------|
| Space group              | <i>P63/m</i>                         | <i>P63/m</i>                                    | <i>P63/m</i>                                    |
| Volume (Å <sup>3</sup> ) | 576.862                              | 575.715                                         | 574.959                                         |
| Crystal system           | hexagonal                            | hexagonal                                       | hexagonal                                       |
| Lattice parameters (Å)   | a= 9.65564<br>b=9.65564<br>c=7.14463 | a= 9.65045<br>b=9.65045<br>c=7.13809            | a=9.64679<br>b=9.64679<br>c=7.13413             |
| $R_{wp}$ (%)             | 8.65                                 | 7.92                                            | 8.52                                            |
| $R_p$ (%)                | 6.01                                 | 5.37                                            | 6.03                                            |
| $\chi^2$ (%)             | 5.76                                 | 5.79                                            | 6.21                                            |

**Table S2** Lattice parameters of CLSO:Dy<sup>3+</sup>, Dy<sup>3+</sup>/Eu<sup>3+</sup>, Dy<sup>3+</sup>/Tb<sup>3+</sup> from room temperature to 523 K.

| Temperature,<br>K                                | a=b, Å  | c, Å    | V, Å <sup>3</sup> |
|--------------------------------------------------|---------|---------|-------------------|
| CLSO:0.02Dy <sup>3+</sup>                        |         |         |                   |
| 303                                              | 9.65509 | 7.14464 | 576.729           |
| 363                                              | 9.65831 | 7.14714 | 577.385           |
| 423                                              | 9.66679 | 7.15251 | 578.834           |
| 473                                              | 9.67139 | 7.15524 | 579.606           |
| 523                                              | 9.67942 | 7.16007 | 580.961           |
| CLSO:0.02Dy <sup>3+</sup> , 0.03Eu <sup>3+</sup> |         |         |                   |
| 303                                              | 9.65335 | 7.14022 | 576.233           |
| 363                                              | 9.65675 | 7.14189 | 576.694           |
| 423                                              | 9.66182 | 7.14568 | 577.686           |
| 473                                              | 9.66850 | 7.14889 | 578.678           |
| 523                                              | 9.67328 | 7.15155 | 579.533           |
| CLSO:0.02Dy <sup>3+</sup> , 0.03Tb <sup>3+</sup> |         |         |                   |
| 303                                              | 9.64790 | 7.13150 | 574.880           |
| 363                                              | 9.65318 | 7.13435 | 575.738           |
| 423                                              | 9.65751 | 7.13638 | 576.421           |
| 473                                              | 9.66141 | 7.13913 | 577.106           |
| 523                                              | 9.66803 | 7.14291 | 578.163           |

**Table S3** Unit-cell parameters determined using Rietveld refinement.

| Compounds                                                                                      | x (Å)  | y (Å)  | z (Å)  | Wyckoff position | $U_{iso}$ |
|------------------------------------------------------------------------------------------------|--------|--------|--------|------------------|-----------|
| CaLa <sub>4</sub> Si <sub>3</sub> O <sub>13</sub> :0.02Dy <sup>3+</sup>                        |        |        |        |                  |           |
| Ca1/La1/Dy1                                                                                    | 0.3333 | 0.6667 | 0.0037 | 4f               | 0.0121    |
| Ca2/La2/Dy2                                                                                    | 0.2451 | 0.0137 | 0.2500 | 6h               | 0.0095    |
| Si                                                                                             | 0.3760 | 0.4053 | 0.2500 | 6h               | 0.0175    |
| O(1)                                                                                           | 0.4663 | 0.5855 | 0.2500 | 6h               | 0.0228    |
| O(2)                                                                                           | 0.4810 | 0.3367 | 0.2500 | 6h               | 0.0048    |
| O(3)                                                                                           | 0.2625 | 0.3455 | 0.0750 | 12i              | 0.0177    |
| O(4)                                                                                           | 0.0000 | 0.0000 | 0.2500 | 2a               | 0.0131    |
| CaLa <sub>4</sub> Si <sub>3</sub> O <sub>13</sub> :0.02Dy <sup>3+</sup> , 0.03Eu <sup>3+</sup> |        |        |        |                  |           |
| Ca1/La1/Dy1/Eu1                                                                                | 0.3333 | 0.6667 | 0.0037 | 4f               | 0.0101    |
| Ca2/La2/Dy2/Eu2                                                                                | 0.2450 | 0.0133 | 0.2500 | 6h               | 0.0006    |
| Si                                                                                             | 0.3729 | 0.4031 | 0.2500 | 6h               | 0.0129    |
| O(1)                                                                                           | 0.4665 | 0.5930 | 0.2500 | 6h               | 0.0221    |
| O(2)                                                                                           | 0.4845 | 0.3310 | 0.2500 | 6h               | 0.0038    |
| O(3)                                                                                           | 0.2563 | 0.3423 | 0.0748 | 12i              | 0.0161    |
| O(4)                                                                                           | 0.0000 | 0.0000 | 0.2500 | 2a               | 0.0125    |
| CaLa <sub>4</sub> Si <sub>3</sub> O <sub>13</sub> :0.02Dy <sup>3+</sup> , 0.03Tb <sup>3+</sup> |        |        |        |                  |           |
| Ca1/La1/Dy1/Tb1                                                                                | 0.3333 | 0.6667 | 0.0033 | 4f               | 0.0120    |
| Ca2/La2/Dy2/Tb2                                                                                | 0.2453 | 0.0135 | 0.2500 | 6h               | 0.0077    |
| Si                                                                                             | 0.3743 | 0.4046 | 0.2500 | 6h               | 0.0154    |
| O(1)                                                                                           | 0.4677 | 0.5948 | 0.2500 | 6h               | 0.0224    |
| O(2)                                                                                           | 0.4796 | 0.3408 | 0.2500 | 6h               | 0.0070    |
| O(3)                                                                                           | 0.2607 | 0.3433 | 0.0737 | 12i              | 0.0210    |
| O(4)                                                                                           | 0.0000 | 0.0000 | 0.2500 | 2a               | 0.0100    |

**Table S4** Details of the LIRs fit parameters in CLSO:Dy<sup>3+</sup>, Dy<sup>3+</sup>/Eu<sup>3+</sup>, Dy<sup>3+</sup>/Tb<sup>3+</sup>

| LIR                                                                                            | fitted equation                | R <sup>2</sup> |
|------------------------------------------------------------------------------------------------|--------------------------------|----------------|
| CaLa <sub>4</sub> Si <sub>3</sub> O <sub>13</sub> :0.02Dy <sup>3+</sup>                        |                                |                |
| B1/B2 <sub>(1)</sub>                                                                           | LIR = 2.12 × exp(-1216.11/T)   | 99.6%          |
| B1/B2 <sub>(2)</sub>                                                                           | LIR = 2.83 × exp(-1216.71/T)   | 99.6%          |
| B1/Y2                                                                                          | LIR = 1.19 × exp(-961.57/T)    | 99.7%          |
| LIR*                                                                                           | LIR = 10.58 × exp(-3628.23/T)  | 99.9%          |
| CaLa <sub>4</sub> Si <sub>3</sub> O <sub>13</sub> :0.02Dy <sup>3+</sup> , 0.03Eu <sup>3+</sup> |                                |                |
| B1/B2 <sub>(1)</sub>                                                                           | LIR = 2.07 × exp(-1052.64/T)   | 98.9%          |
| B1/B2 <sub>(2)</sub>                                                                           | LIR = 2.74 × exp(-1057.89/T)   | 99.2%          |
| B1/Y2                                                                                          | LIR = 1.80 × exp(-955.69/T)    | 98.4%          |
| B1/Eu1                                                                                         | LIR = 1.73 × exp(-1102.10/T)   | 97.0%          |
| LIR*                                                                                           | LIR = 137.96 × exp(-5248.13/T) | 99.9%          |
| CaLa <sub>4</sub> Si <sub>3</sub> O <sub>13</sub> :0.02Dy <sup>3+</sup> , 0.03Tb <sup>3+</sup> |                                |                |
| B1/B2 <sub>(1)</sub>                                                                           | LIR = 0.82 × exp(-697.33/T)    | 99.3%          |
| B1/B2 <sub>(2)</sub>                                                                           | LIR = 0.78 × exp(-789.60/T)    | 99.6%          |
| B1/Tb1                                                                                         | LIR = 0.67 × exp(-784.28/T)    | 99.7%          |
| B1/Y2                                                                                          | LIR = 0.34 × exp(-606.21/T)    | 99.6%          |
| B1/Tb2                                                                                         | LIR = 2.46 × exp(-645.89/T)    | 99.4%          |
| LIR*                                                                                           | LIR = 0.48 × exp(-3657.80/T)   | 99.9%          |

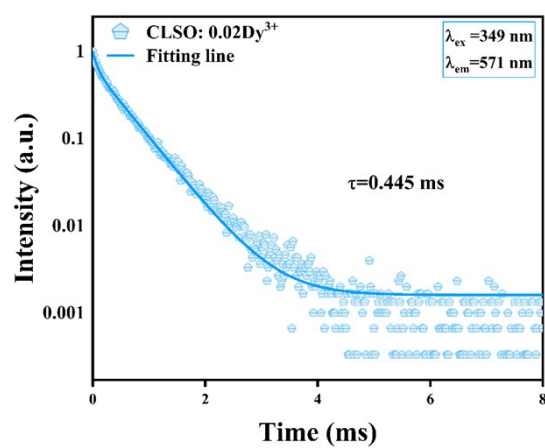

**Fig. S1** Luminescence lifetime curve of  ${}^4\text{F}_{9/2} \rightarrow {}^6\text{H}_{13/2}$  transition of 0.02Dy<sup>3+</sup> doped CLSO phosphor, recorded following excitation at 349 nm.

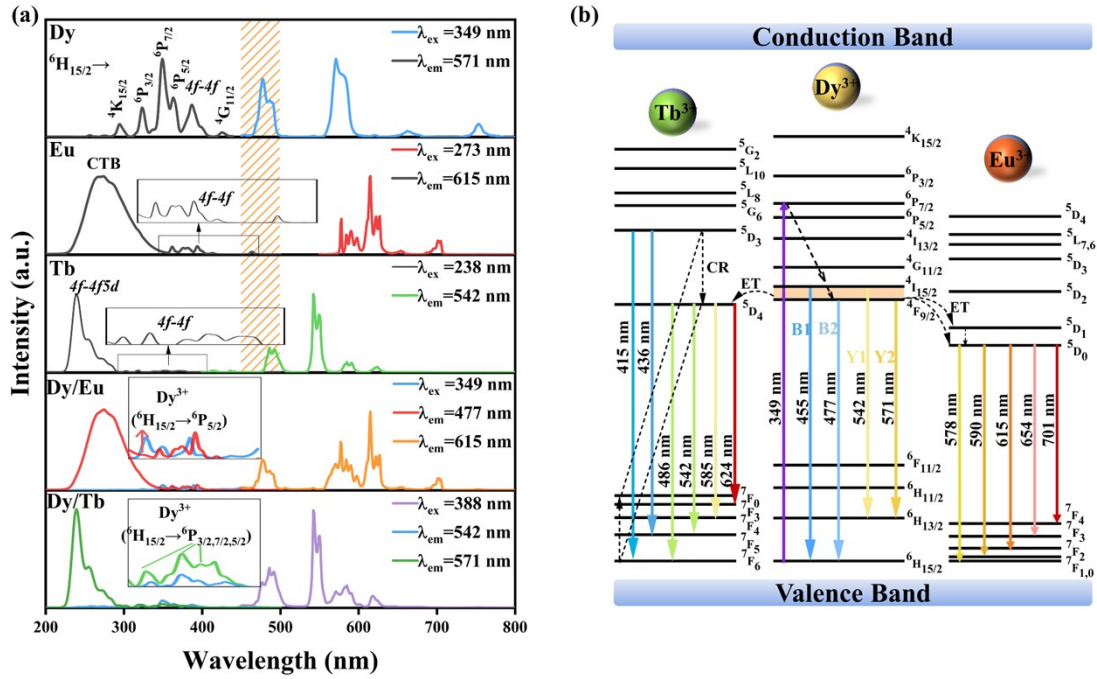

**Fig. S2** (a) The PLE and PL spectra of Dy<sup>3+</sup>, Eu<sup>3+</sup>, Tb<sup>3+</sup> ions singly doped and Dy<sup>3+</sup>/Eu<sup>3+</sup>, Dy<sup>3+</sup>/Tb<sup>3+</sup> co-doped CLSO phosphors. (b) Energy level diagram and energy transfer model of Dy<sup>3+</sup>, Tb<sup>3+</sup> and Eu<sup>3+</sup>.

After the electrons in  ${}^6\text{H}_{15/2}$  level of the Dy<sup>3+</sup> are pumped to the  ${}^6\text{P}_{7/2}$  excited state, part of the electrons is non-radiatively relaxed to the  ${}^4\text{F}_{9/2}$  excited state and the characteristic emission of Dy is produced. Meanwhile, some of the electrons on the excited  ${}^4\text{F}_{9/2}$  energy level of Dy<sup>3+</sup> transfer to the neighboring Eu<sup>3+</sup> ( ${}^5\text{D}_0$ ) state and Tb<sup>3+</sup> ( ${}^5\text{D}_4$ ) level. The excited  ${}^5\text{D}_0$  electrons then relax to the  ${}^7\text{F}_0$ ,  ${}^7\text{F}_1$ ,  ${}^7\text{F}_2$ ,  ${}^7\text{F}_3$ , and  ${}^7\text{F}_4$  levels, producing emissions of 578 nm, 590 nm, 615 nm, 654 nm, and 701 nm, respectively. Similarly, electron transitions from Tb<sup>3+</sup>  ${}^5\text{D}_4$  levels to  ${}^7\text{F}_J$  (J=6,5,4,3) produce emissions of 486 nm, 542 nm, 585 nm, and 624 nm, respectively.

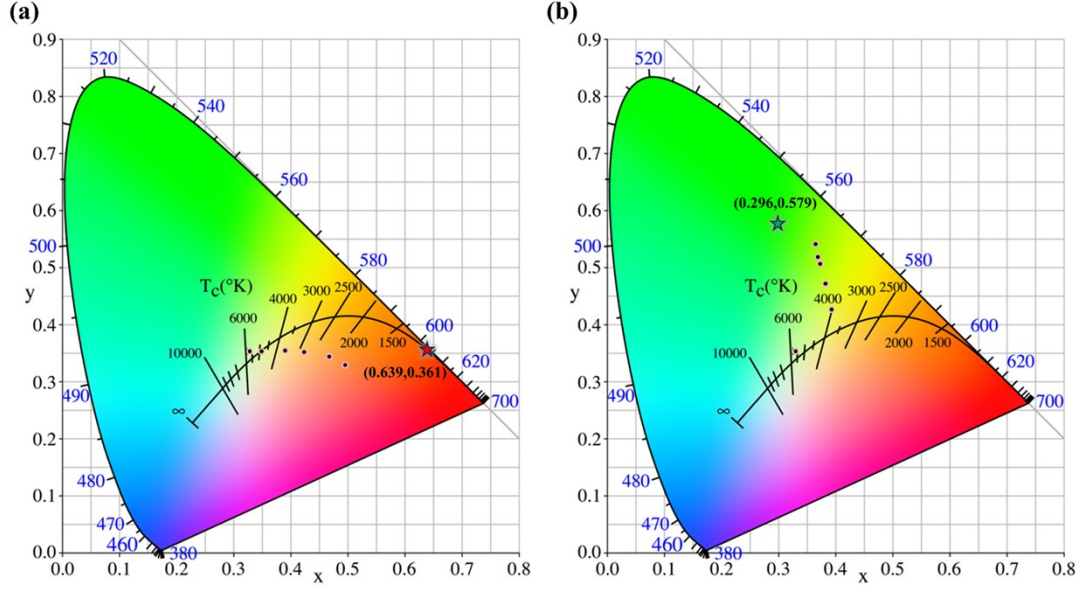

**Fig. S3** CIE chromaticity coordinates for (a) CLSO:0.09Eu<sup>3+</sup> and CLSO:0.02Dy<sup>3+</sup>,xEu<sup>3+</sup> (0 ≤ x ≤ 0.09) samples. (b) CIE chromaticity coordinates for CLSO:0.11Tb<sup>3+</sup> and CLSO:0.02Dy<sup>3+</sup>,xTb<sup>3+</sup> (0 ≤ x ≤ 0.09) samples.

The color purity (C.P.) of the samples is calculated as follows:

$$C.P. = \frac{\sqrt{(x_s - x_i)^2 + (y_s - y_i)^2}}{\sqrt{(x_d - x_i)^2 + (y_d - y_i)^2}} \times 100\%$$

where (x<sub>d</sub>, y<sub>d</sub>) are the coordinates of the dominant wavelength, (x<sub>s</sub>, y<sub>s</sub>) are the coordinates of the sample point, and (x<sub>i</sub>, y<sub>i</sub>) are the coordinates of the white light. In this study, (x<sub>d</sub>, y<sub>d</sub>) = (0.444, 0.554), (0.670, 0.330) or (0.244, 0.743) for a dominant wavelength of 571 nm, 615 nm and 542 nm, and (x<sub>i</sub>, y<sub>i</sub>) = (0.3101, 0.3162).<sup>1-3</sup> The C.P. of optimal single doped samples with Dy<sup>3+</sup>, Eu<sup>3+</sup> and Tb<sup>3+</sup> are 21.1%, 92.2% and 60.9%, respectively. Based on the CIE results, an increase of Eu<sup>3+</sup> and Tb<sup>3+</sup> concentrations could result in the color coordinates of CLSO:Dy<sup>3+</sup>/Eu<sup>3+</sup> and CLSO:Dy<sup>3+</sup>/Tb<sup>3+</sup> shifting to the ideal red and green chromaticity. When the concentration of co-doped Eu<sup>3+</sup> and Tb<sup>3+</sup> reaches 0.09, the C.P. values of the samples increase to 51.9% and 53.6%, respectively.

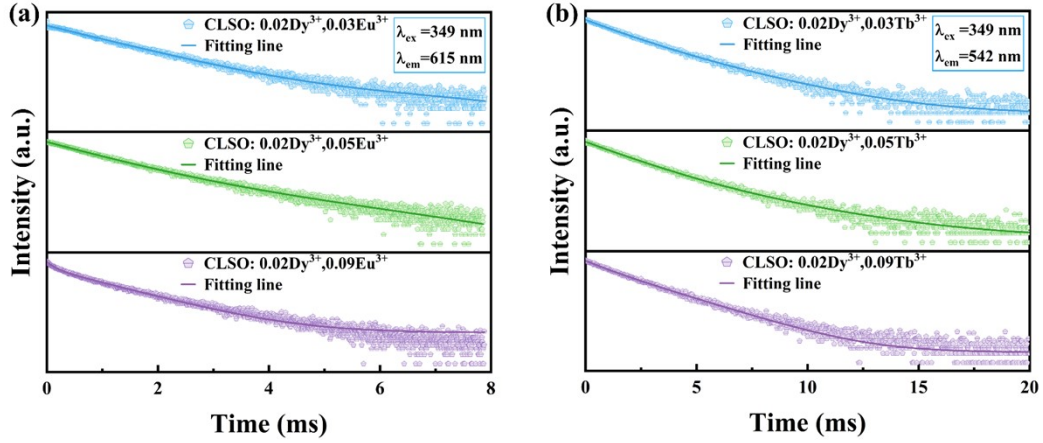

**Fig. S4** The decay curves of (a)  $\text{Eu}^{3+}$  in the  $\text{CLSO:0.02Dy}^{3+}, x\text{Eu}^{3+}$  ( $x=0.03, 0.05, 0.09$ ) and (b)  $\text{Tb}^{3+}$  in the  $\text{CLSO:0.02Dy}^{3+}, x\text{Tb}^{3+}$  ( $x=0.03, 0.05, 0.09$ ) phosphors.

Because of the ET process, the lifetime of  $\text{Eu}^{3+}$  increases from 0.98 ms to 1.16 ms, while decreasing to 0.87 ms when the  $\text{Eu}^{3+}$  concentration is increased to 0.09.<sup>4</sup> The lifetime of  $\text{Tb}^{3+}$  also exhibits a similar pattern, increasing from 1.95 ms to 2.01 ms and subsequently decreasing to 1.82 ms due to concentration quenching.<sup>5</sup>

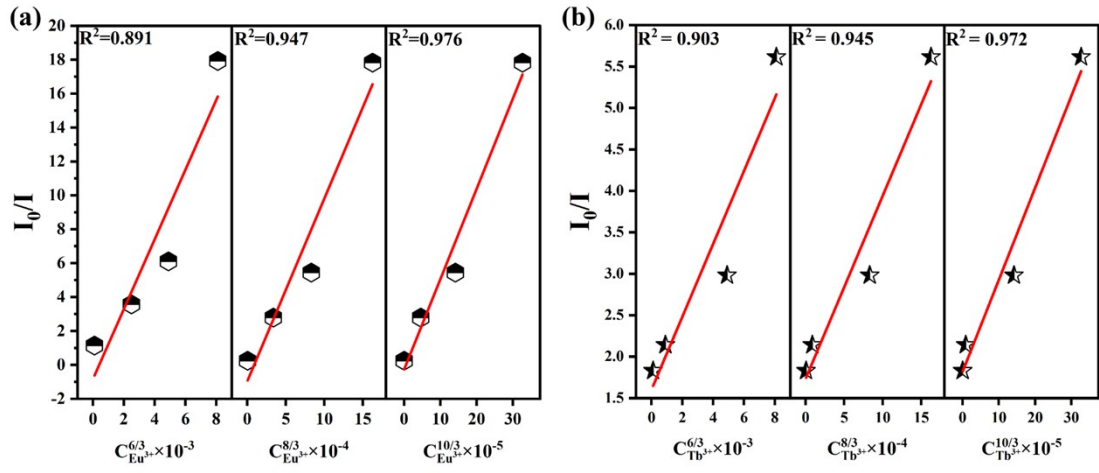

**Fig. S5** Dependence of  $(I_0/I)$  of Dy<sup>3+</sup> on  $C^{\alpha/3}$  ( $\alpha=6, 8, 10$ ) in (a) CLSO:0.02Dy<sup>3+</sup>, 0.03Eu<sup>3+</sup> and (b) CLSO:0.02Dy<sup>3+</sup>, 0.03Tb<sup>3+</sup>.

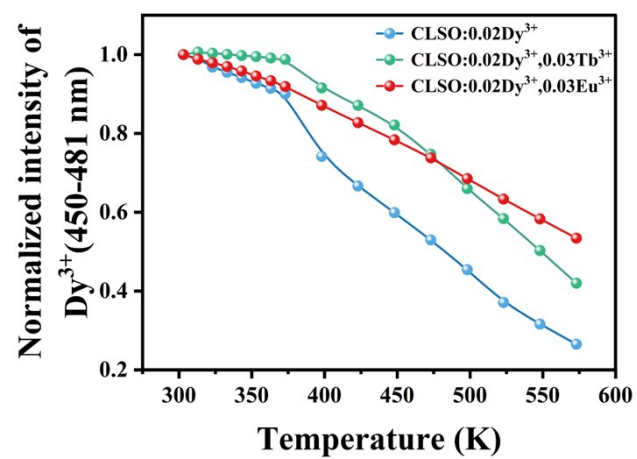

**Fig. S6** Normalized integral luminescence intensity of Dy<sup>3+</sup> 450-481nm in three samples as a function of temperature.

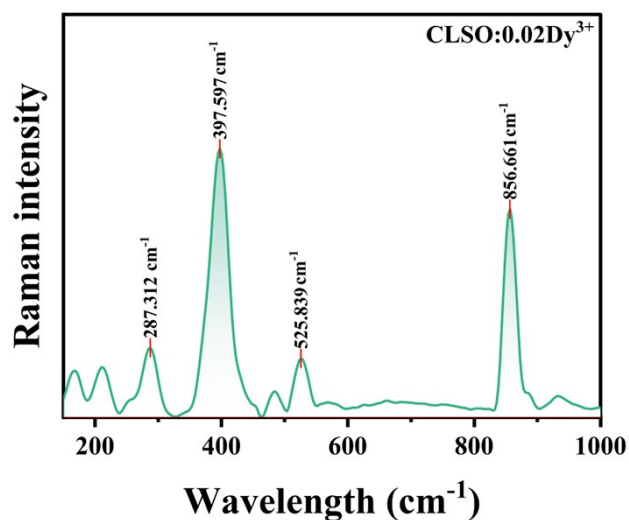

**Fig. S7** Raman spectrum for CLSO:0.02Dy<sup>3+</sup>.

The peaks above 350 cm<sup>-1</sup> are assigned to internal modes of SiO<sub>4</sub> tetrahedral units. The symmetric stretching mode  $\nu_1$  of SiO<sub>4</sub> tetrahedral is assigned to the strong peak at about 856 cm<sup>-1</sup>, while the asymmetric mode  $\nu_3$  is responsible for the weak band at about 930 cm<sup>-1</sup>. The peak at about 526 cm<sup>-1</sup> is attributed to the asymmetric bending  $\nu_4$  mode and the strongest peak at about 398 cm<sup>-1</sup> belongs to the symmetric bending  $\nu_2$  mode. The external modes involving translations and rotational oscillations of the SiO<sub>4</sub>, LaO<sub>7</sub> and LaO<sub>9</sub> units are expected to contribute to the Raman peaks at below 350 cm<sup>-1</sup>.<sup>6</sup>

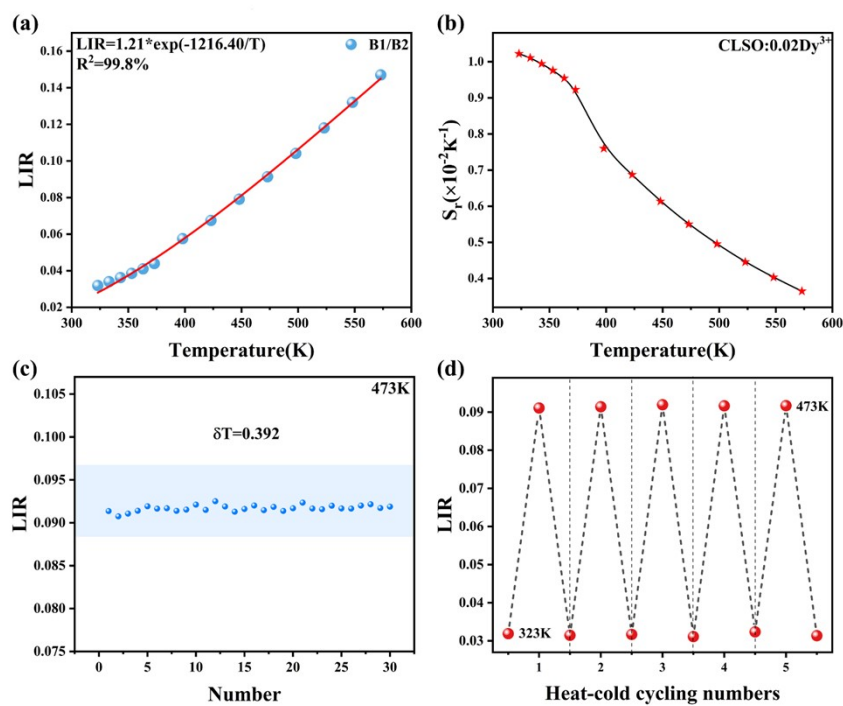

**Fig. S8** (a) Evolution of LIR(B1/B2) under various temperatures for CLSO:0.02Dy<sup>3+</sup>. (b) and (c) The  $S_r$  and  $\delta T$  values of CLSO:0.02Dy<sup>3+</sup> phosphor. (d) LIR values of the temperature-cycle measurements.

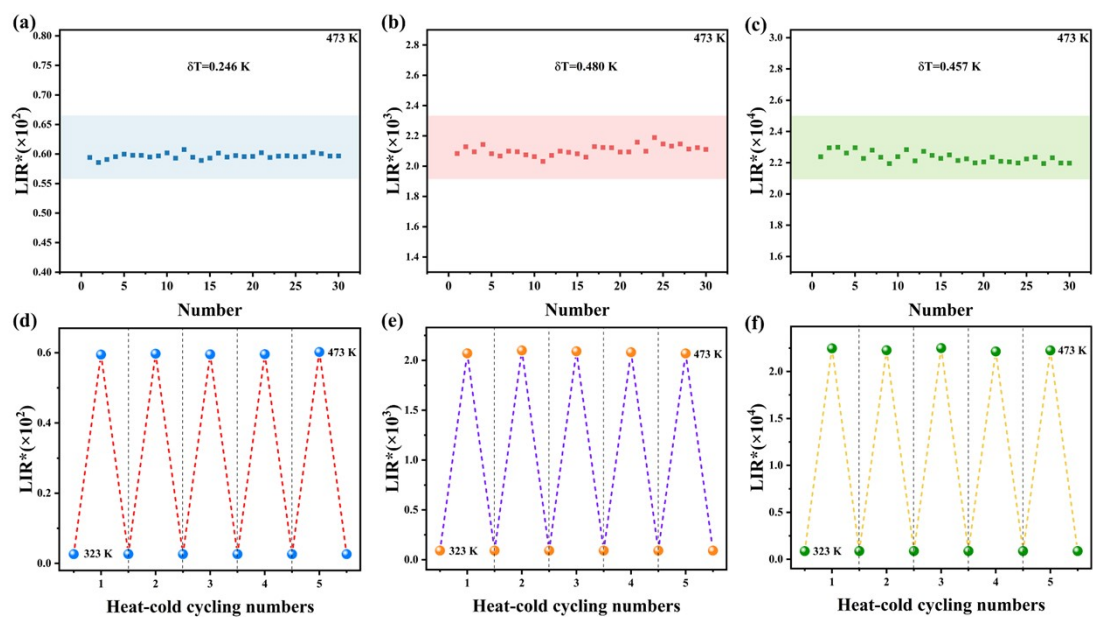

**Fig. S9** Fluctuation of  $LIR^*$  and the calculated temperature resolution  $\delta T$  at 473 K of (a)  $CLSO:0.02Dy^{3+}$ , (b)  $0.02Dy^{3+}, 0.03Eu^{3+}$ , (c)  $0.02Dy^{3+}, 0.03Tb^{3+}$  phosphors. (d-f)  $LIR^*$  values of the temperature-cycle measurements.

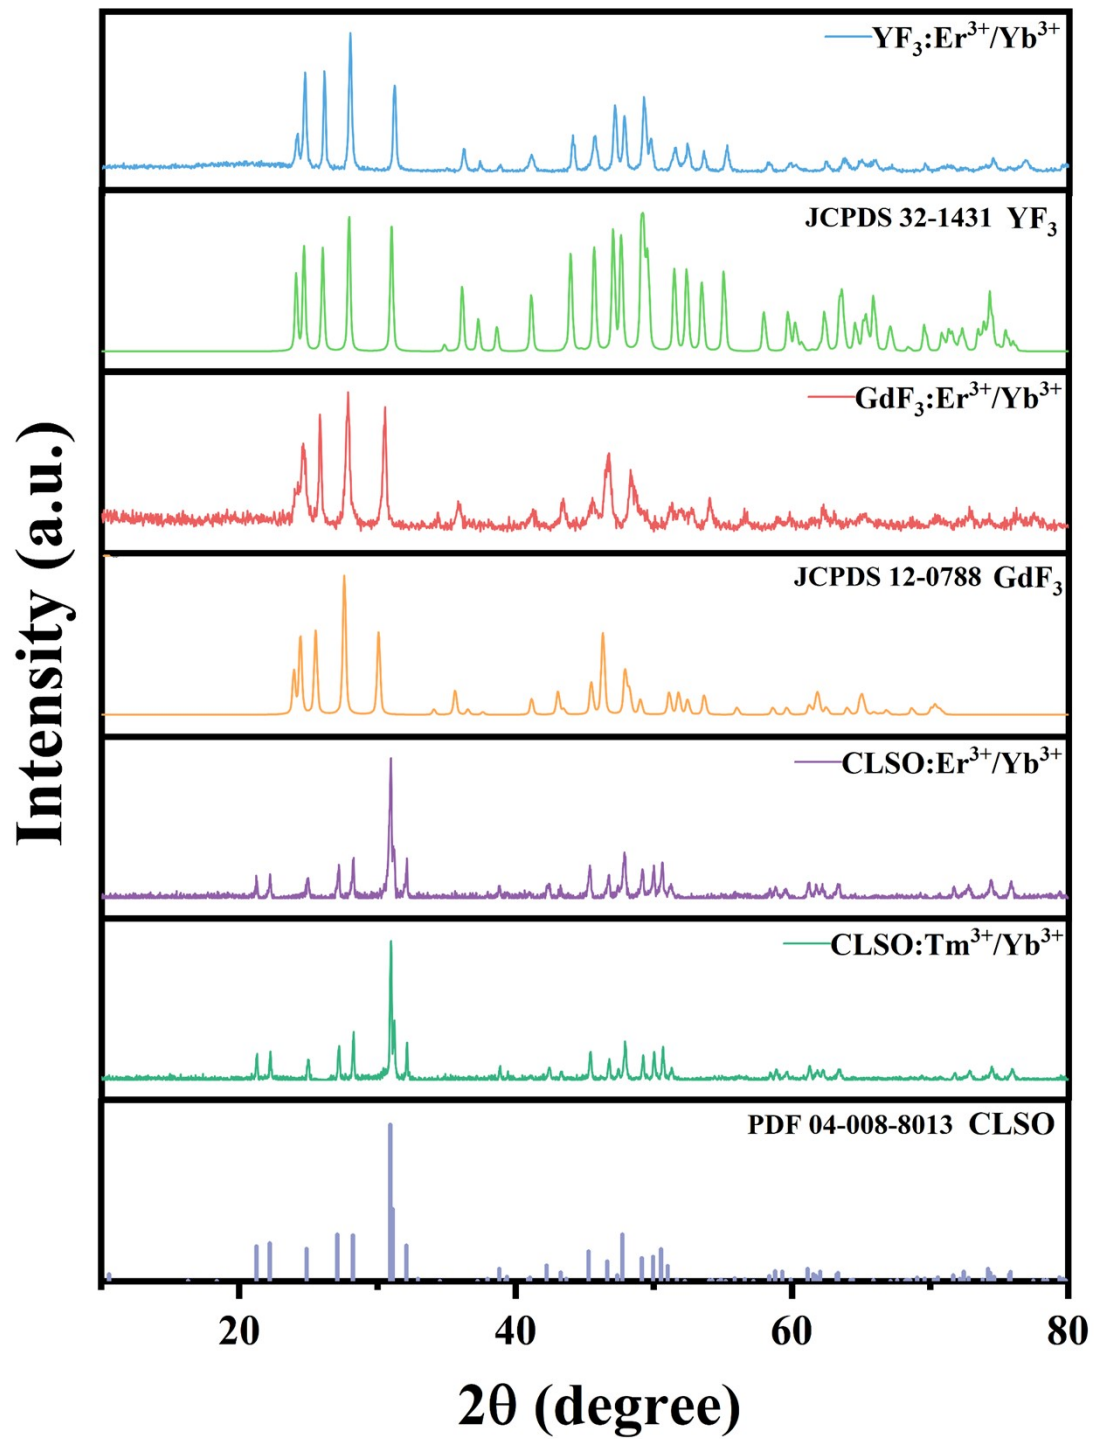

**Fig. S10** XRD patterns of GdF<sub>3</sub>:0.01Er<sup>3+</sup>,0.05Yb<sup>3+</sup>, YF<sub>3</sub>:0.01Er<sup>3+</sup>,0.05Yb<sup>3+</sup>, CLSO:0.01Er<sup>3+</sup>,0.05Yb<sup>3+</sup> and CLSO:0.003Tm<sup>3+</sup>,0.05Yb<sup>3+</sup> samples.

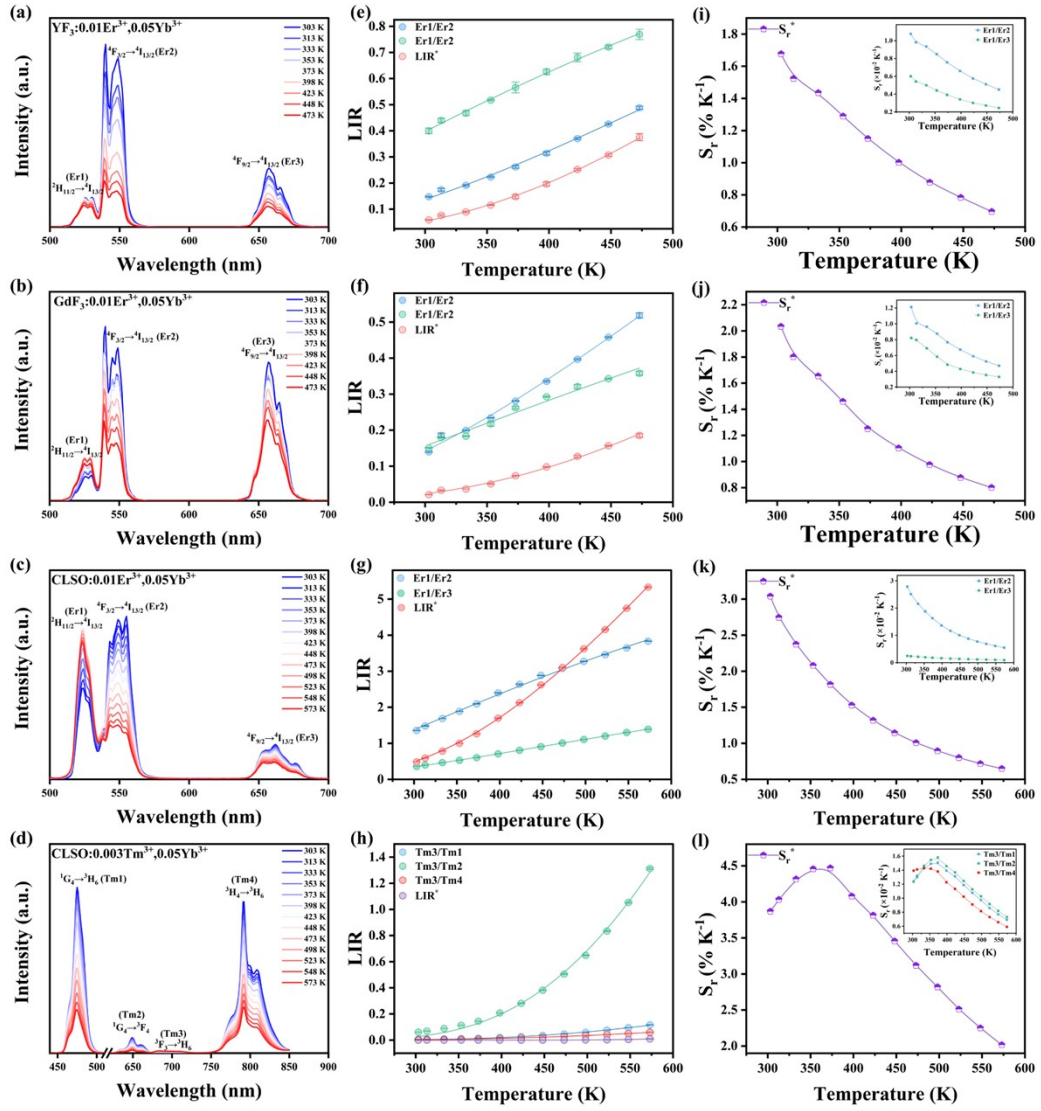

**Fig. S11** (a-d) Thermal evolution spectra of 0.01Er<sup>3+</sup> and 0.05Yb<sup>3+</sup> co-doped GdF<sub>3</sub>/YF<sub>3</sub>/CLSO and CLSO:0.003Tm<sup>3+</sup>, 0.05Yb<sup>3+</sup> phosphors. (e-h) Evolution of LIRs and (i-l) the relative sensitivities under various temperatures.

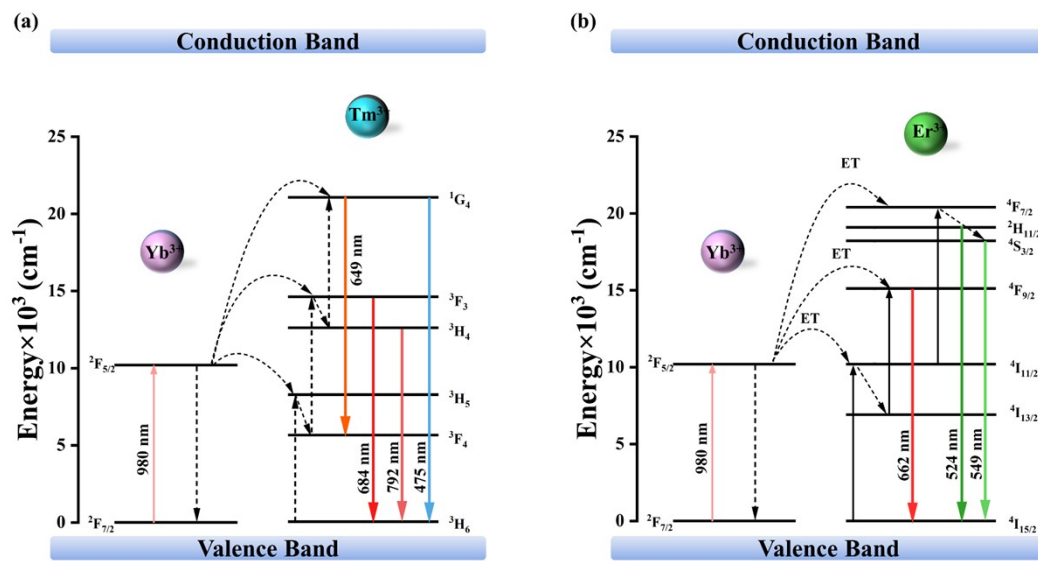

**Fig. S12** Energy level diagrams of  $\text{Er}^{3+}$ ,  $\text{Tm}^{3+}$  and possible up-conversion mechanism.<sup>7</sup>

## References

- 1 K. A. Denault, J. Brgoch, M. W. Gaultois, A. Mikhailovsky, R. Petry, H. Winkler, S. P. DenBaars, and R. Seshadri, Microwave-assisted synthesis of GdOF:Eu<sup>3+</sup>/Tb<sup>3+</sup> ultrafine phosphor powders suitable for advanced forensic and security ink applications, *J. Colloid Interface Sci.*, 2023, **641**, 1014–1032.
- 2 H. Tang, X. Zhang, L. Cheng, X. Mi and Q. Liu, Thermally stable and highly efficient red-emitting Eu<sup>3+</sup>-doped Cs<sub>3</sub>GdGe<sub>3</sub>O<sub>9</sub> phosphors for WLEDs: non-concentration quenching and negative thermal expansion, *Light-Sci. Appl.*, 2021, **10**, 29.
- 3 T. Otsuka, R. Oka, and T. Hayakawa, Eu<sup>3+</sup> Site Distribution and Local Distortion of Photoluminescent Ca<sub>3</sub>WO<sub>6</sub>:(Eu<sup>3+</sup>,K<sup>+</sup>) Double Perovskites as High-Color-Purity Red Phosphors, *Adv. Sci.*, 2023, **10**, 2302559.
- 4 Y. Liu, J. Wang, X. Liu, H. Zhang and H. Liu, Energy transfer and luminescence properties of BaSr<sub>2</sub>Gd<sub>1-x</sub>M<sub>x</sub>(PO<sub>4</sub>)<sub>3</sub> (M= Dy, Tm, Eu) phosphors for warm white UV LEDs, *Opt. Mater.*, 2019, **95**, 109194.
- 5 Y. Zhang, L. Mei, S. M. Aksenov, H. Liu, D. Zhang and Z. Huang, New apatite-type phosphor Ca<sub>9</sub>La(PO<sub>4</sub>)<sub>5</sub>(SiO<sub>4</sub>)F<sub>2</sub>:Tb<sup>3+</sup>,Dy<sup>3+</sup> with improved color rendering index, *J. Am. Ceram. Soc.*, 2020, **103**, 2602-2609.
- 6 J. Song, K. Song, J. Wei, H. Lin, J. Xu, J. Wu and W. Su, Microstructure characteristics and microwave dielectric properties of calcium apatite ceramics as microwave substrates, *J. Alloy. Compd.*, 2018, **731**, 264-270.
- 7 K. Zhu, H. Xu, Z. Wang and Z. Fu, Lanthanide-doped lead-free double perovskite La<sub>2</sub>MgTiO<sub>6</sub> as ultra-bright multicolour LEDs and novel self-calibrating partition optical thermometer, *Inorg. Chem. Front.*, 2023, **10**, 3383-3395.
